# 1 Eye Movements Do Not Affect Perceived Size

2 Paul Linton

3

4 Centre for Applied Vision Research, City, University of London

5 Northampton Square, Clerkenwell, London EC1V 0HB

6 [paul@linton.vision](mailto:paul@linton.vision)

7

8 Visual Scale - Size Constancy - Vergence - Taylor Illusion – Multisensory Integration

9

## 10 **Abstract**

11 Since Kepler (1604) and Descartes (1637), it's been suggested that 'vergence' (the angular rotation  
12 of the eyes) plays a key role in size constancy (objects appearing to have a constant size despite  
13 changes in distance radically altering the size of the retinal image). However, this has never been  
14 tested divorced from confounding cues such as changes in the retinal image. In our experiment  
15 participants viewed a target which grew or shrank over 5 seconds. At the same time their vergence  
16 was increased from 50cm to 25cm. The question was whether this vergence increase biased the  
17 participants' judgements of whether the target grew or shrank? We found no evidence of any bias,  
18 and therefore no evidence that eye movements affect perceived size. This finding has three  
19 important implications: First, perceived size is much more reliant on cognitive influences than  
20 previously thought. This is consistent with the argument that visual scale is purely cognitive in  
21 nature (Linton, 2017; 2018). Second, vergence modulation of V1 should no longer be thought of  
22 as a candidate mechanism for size constancy. Third, the influence of multisensory integration on  
23 visual size appears to be reliant on subjective knowledge about changes in hand and gaze position.

## 24 **Introduction**

25

26 As objects move forwards or backwards in space, the image they cast on the retina varies drastically  
27 in size. And yet objects don't appear to change dramatically in size when they move closer or  
28 further away. This suggests that there is a neural mechanism ('size constancy') that compensates  
29 for the drastic changes in the retinal image caused by changes in distance (for a review see  
30 Sperandio & Chouinard, 2015). We can distinguish between two kinds of visual cues for size  
31 constancy: 1. Pictorial Cues, which are present in the static monocular retinal image (such as  
32 familiar size and perspective), and which account for the impression of size constancy in pictures.  
33 And 2. Triangulation Cues, which typically rely on introducing multiple viewpoints either  
34 simultaneously (vergence and binocular disparities) or consecutively (motion parallax).

35 1. Pictorial Cues: The neural correlates of size constancy are better understood for pictorial  
36 cues since 2D pictures are more easily presented to participants in fMRI scanners (e.g. Murray et  
37 al., 2006). However, pictorial cues are neither necessary nor sufficient for size constancy. First,  
38 pictorial cues are unnecessary because, as we shall discuss below, observers in the Taylor illusion  
39 appear to experience something close to full size constancy from vergence alone. Second, pictorial  
40 cues are insufficient because, as Sperandio et al. (2012) observe, size constancy in pictures is merely  
41 a fraction (10%-45%) of the full size constancy experienced in the real world (Emmert, 1881)  
42 (Murray et al., 2006; Leibowitz et al., 1969; Goodale, 2020 estimates 10%-30%; see also Millard et  
43 al., 2020 for a recent attempt to disambiguate static monocular and binocular size constancy,  
44 although recognising vergence may have influenced their monocular results).

45 2. Triangulation Cues: In terms of triangulation cues to size constancy (vergence, binocular  
46 disparity, motion parallax), the emphasis has been on vergence. There are two reasons for this.  
47 First, motion parallax is neither necessary for size constancy (full size constancy is observed by  
48 participants in an fMRI scanner in Sperandio et al., 2012), nor is there particularly strong evidence  
49 that motion parallax contributes to size constancy (Combe & Wexler, 2010 only marginally qualify

50 “the common notion that size constancy emerges as a result of retinal and vergence processing  
51 alone”). Second, binocular disparity is typically regarded as merely providing relative depth, and  
52 not absolute size and distance. Still, considering size constancy only requires relative changes in  
53 distance to be matched by relative changes in apparent size ( $\text{distance}_1 \div \text{distance}_2 = \text{size}_1 \div \text{size}_2$ ),  
54 a merely relative depth cue could suffice. The problem is that binocular disparity doesn’t even  
55 provide relative depth information until it has been scaled by absolute distance information, which  
56 is typically assumed to come from vergence. As Brenner & van Damme (1998) observe, a 1°  
57 change in retinal disparity could equally reflect a change in distance of 20cm to 21cm (5% increase  
58 in distance) or 2m to 4m (100% increase in distance).

59       There is also a deeper conceptual point. Although Linton (2017; 2018) explores the  
60 possibility that vision may be divorced from absolute size and distance, orthodox discussions of  
61 size constancy typically articulate it in terms of the visual system using absolute distance to  
62 determine perceived size. For instance, Emmert’s Law (Emmert, 1881) is typically articulated as  $S$   
63  $= c(R \times D)$ , where  $S$  is perceived size,  $c$  is a constant,  $R$  is retinal image size, and  $D$  is perceived  
64 distance. But, as we already mentioned, binocular disparity is typically thought of as being a merely  
65 relative depth cue outside very limited circumstances (objects taking up at least 20° of the visual  
66 field; Rogers & Bradshaw, 1995). Instead, vergence is typically cited as being one of our most  
67 important absolute distance cues at near distances (Mon-Williams & Tresilian, 1999; Viguier et al.,  
68 2001; for a review and challenge to this consensus, see Linton, 2020).

69       Kepler (1604) and Descartes (1637) were the first to suggest that the visual system uses  
70 vergence (the angular rotation of the eyes) to estimate distance, and scale the size of the retinal  
71 image appropriately. For the last three hundred years, evidence for the role of vergence in size  
72 constancy has come from four specific contexts where it has been found that changing the  
73 vergence angle affects the perceived size of objects (so-called ‘vergence micropsia’):

74       1. Wallpaper Illusion: Before the invention of the stereoscope by Wheatstone (1838), the  
75 earliest evidence of vergence micropsia was the ‘wallpaper illusion’, the observation that if you

76 cross your eyes whilst looking at a recurring wallpaper pattern, the wallpaper pattern appears  
77 smaller and closer (Smith, 1738; Priestley, 1772; Goethe, 1810; Meyer, 1842, 1852; Brewster, 1844;  
78 Locke, 1849; Lie, 1965; Ono et al., 1971; Kohly & Ono, 2002; see Howard, 2012 for review).

79         2. Stereoscopic Viewing: The invention of the stereoscope by Wheatstone (1838) (which  
80 presents separate images to each eye) enabled the eyes to be rotated independently of the retinal  
81 image. Wheatstone observed that if eye rotation was increased, the perceived image appeared to  
82 shrink, even though the images shown to each eye remained fixed (Wheatstone, 1852; Helmholtz,  
83 1866, p.313; Judd, 1897; Frank, 1930; Hermans, 1937, 1954; Locke, 1938; Adams, 1955; Von Holst,  
84 1955a, 1955b, 1957; Heinemann et al., 1959; Gogel, 1962; Biersdorf et al., 1963; Wallach &  
85 Zuckerman, 1963; McCready, 1965; Leibowitz & Moore, 1966; Leibowitz et al., 1972; Komoda &  
86 Ono, 1974; Regan et al., 1986; Enright, 1989).

87         3. Telestereoscopic Viewing: Building on Wheatstone (1838), Helmholtz (1857) invented  
88 the telestereoscope, and observed that if we use mirrors to artificially increase the distance between  
89 the two eyes, the world appears miniaturised. In his *Treatise on Physiological Optics* he observed that  
90 “it will seem as if the observer were not looking at the natural landscape itself, but a very exquisite  
91 and exact model of it, reduced in scale” (Helmholtz, 1866, p.312). This effect has been attributed  
92 to vergence by Helmholtz (1857; 1858; 1866, p.310) and Rogers (2009; 2011), since the eyes need  
93 to rotate more to fixate on the same physical distance (cf. Linton, 2018 for an alternative account),  
94 and has been extensively studied in the military research (where helicopter pilots often view the  
95 world through cameras with increased interpupillary separation, see Newman & Ostler, 2009;  
96 Stuart et al., 2009; and Priot et al., 2010; 2011; 2012; 2018).

97         4. Taylor Illusion: Vergence is also thought to be central to the multisensory integration of  
98 hand motion and the retinal image in the Taylor illusion. If you make an after-image of your hand  
99 with a bright flash, and then in complete darkness move your hand closer to your face, the after-  
100 image of your hand appears to shrink even though it is fixed on the retina (Taylor, 1941). The best  
101 current explanation for the Taylor illusion is that it is due (Taylor, 1941; Morrison & Whiteside,

102 1984; Mon-Williams et al., 1997) or almost entirely due (Sperandio et al., 2013) to the increase in  
103 vergence as the eyes track the physical hand in darkness (see also Gregory et al., 1959; Carey &  
104 Allan, 1996; Bross, 2000; Ramsay et al., 2007; Faivre et al., 2017a; and for vergence scaling of after-  
105 images see Urist, 1959; Suzuki, 1986; Lou, 2007; Zenkin & Petrov, 2015). Most notably, when  
106 Sperandio et al. (2013) moved the participant's hand and vergence in opposite directions, they  
107 found that (a) the after-image size changed in the direction of vergence, not the hand movement,  
108 and (b) the magnitude of the size change when vergence and the hand were in conflict was almost  
109 as large as when both the hand and vergence were moving in the same direction.

110         Surveying the literature on vergence micropsia, two things are striking: First, to our  
111 knowledge, there has never been a report of a failure of vergence micropsia within peripersonal  
112 space (near distances corresponding to arms reach). Even on the rare occasions when a change in  
113 vergence fails to provide an impression of motion-in-depth (for instance, when motion-in-depth  
114 is vetoed by a stimulus that takes up the whole visual field) as in Regan et al. (1986), the authors  
115 still report “apparent size changes as about threefold when convergence changed from about 0  
116 deg to 25 deg”. And this is to be expected. As Regan et al. (1986) note: “Changes in size and depth  
117 produced by ocular vergence changes are well known”.

118         Second, the after-image literature appears to suggest that vergence provides something  
119 close to perfect size constancy for distances between 25-50cm. This can be seen for two reasons:  
120 First, because size constancy appears close to perfect for 25-50cm when vergence is the only  
121 distance cue. Apparent size doubled for the representative subject in Sperandio et al. (2013)  
122 (incongruent condition) from 3.3cm at 25cm (suggested by the  $y = -0.61x + 3.3$  line of best fit) to  
123 6.3cm at 50cm (average of size estimates after a  $>3^\circ$  vergence eye movement) (my analysis of their  
124 Fig.5 using WebPlotDigitizer 4.2; Marin et al., 2017). Second, the same conclusion is arrived at by  
125 a combination of the fact that (a) the Taylor illusion provides near perfect size constancy in this  
126 distance range (Bross, 2000; Ramsay et al., 2007; Sperandio et al., 2013), coupled with the fact that  
127 (b) the Taylor illusion can be attributed almost entirely to vergence (Sperandio et al., 2013).

128 Vergence size constancy is therefore regarded as a fundamental aspect of visual perception.

129 However, we believe that vergence size constancy should be re-evaluated for two reasons:

130 First, our recent work suggests that vergence is an ineffective absolute distance cue once  
131 confounding cues have been controlled for. Participants are unable to use vergence to judge  
132 absolute distance (Linton, 2020), and we are reluctant to embrace the possibility (raised by Ono &  
133 Comerford, 1977 and Bishop, 1989) that vergence might still be an effective size constancy cue  
134 even if it proves to be ineffective for absolute distance judgements.

135 Second, one surprising fact is that to the best of our knowledge vergence size constancy  
136 has never been tested divorced from confounding cues (such as changes in the retinal image or  
137 changes in hand position) which inform the observer about changes in distance. The reason for  
138 this is easy to appreciate. Vergence can only be driven in one of two ways. Either participants track  
139 the retinal slip of a visual object moving in depth (such as an LED: Mon-Williams et al., 1997;  
140 Sperandio et al., 2013), in which case participants are informed about the change in distance by  
141 binocular disparity (the apparent retinal slip of the stimulus as it moves in depth). Or participants  
142 track their own hand moving in depth (as in the Taylor illusion), but this gives them proprioceptive  
143 information about the changing distance instead. The purpose of our experiment was therefore to  
144 test vergence size constancy in a context where it is known to be effective (vergence changes over  
145 5 seconds from 25cm to 50cm: Sperandio et al., 2013), but in a way that controls for subjective  
146 knowledge about the changing distance.

147

## 148 Materials and Methods

Subjects view a target over 5 seconds that...

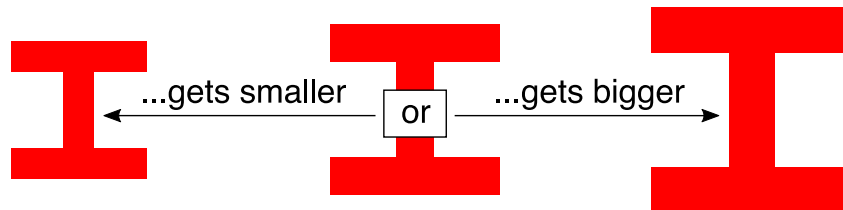

At the same time their vergence changes from 50cm to 25cm

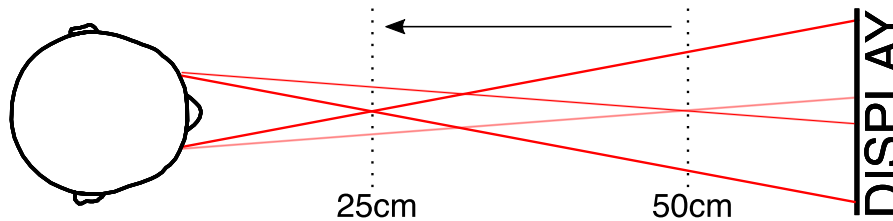

And subjects are asked "Did the target get bigger or smaller?"

Question: Does the change in vergence bias their response?

149

150

151 Figure 1. Experimental Paradigm. Subjects viewed a target getting bigger or smaller over 5 seconds

152 whilst their vergence changed from 50cm to 25cm, and were asked to judge whether the target got

153 bigger or smaller? The question was whether vergence biased their response?

154

155 This posed a complex technical challenge which we resolved in five ways:

156 1. First, in order to drive vergence without providing subjective distance information, we

157 used a visual stimulus that (unlike an LED) provided 'sub-threshold' binocular disparities:

158 binocular disparities that are visible to the participant's visual system (in order to drive vergence),

159 but subjectively invisible to the participant themselves. This we achieved with a 3° target moving

160 in depth from 50cm to 25cm over 5 seconds. The target consisted of two targets on a display: a

161 left-hand target that only the right eye could see, and a right-hand target than only the left eye

162 could see. And by increasing the separation between the targets, we could increase the participant's

163 vergence angle (Fig.1). Rotating metal plates (Fig.3) ensured that each eye only saw the appropriate

164 target, and participants were asked to confirm that they saw a single fused target when they first  
165 entered the apparatus, and to report if the target ever went double.

166 2. Second, in order to present a constant retinal image with eye rotation, we rendered the  
167 targets to maintain a constant radius from, and orientation to, the eye. This was achieved in  
168 OpenGL by ‘projecting’ the target onto the display, so that the correct retinal image was achieved  
169 when the participants viewed the target (Fig.2) (camera set in OpenGL to nodal point of the eye,  
170 and an asymmetric frustum was used so that the far clipping plane matched the distance and  
171 dimensions of the display). A bite bar was used to ensure that the nodal point of the eye remained  
172 fixed during the experiment (Fig.3), and the 6mm difference between the nodal point and the  
173 centre of rotation of the eye was intentionally ignored (cf. Linton, 2019; Konrad et al., 2019).

174

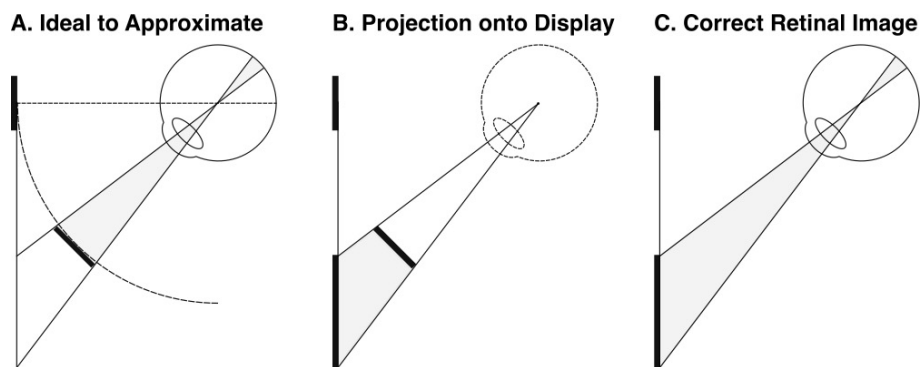

175

176 Figure 2. OpenGL rendering of target achieves the correct retinal image for a target with a constant  
177 radius and orientation to the eye, whilst presenting the target on a fronto-parallel display.

178

179 3. Third, another challenge of this display is that it requires the eyes to focus (or  
180 ‘accommodate’) at the distance of the display (160cm), whilst vergence (the angular rotation of the  
181 eyes) is at 25-50cm. This decoupling of vergence and accommodation doesn’t happen in normal  
182 viewing conditions, and too much vergence-accommodation conflict can lead to the target going  
183 blurry or double. To solve this problem we had an optometrist fit each participant with contact  
184 lenses (based on the participant’s valid UK prescription) so that the optical distance of the display



185 was 33cm even though its physical distance was 160cm. This ensured a maximum of  $\pm 1$   
186 dioptres of vergence-accommodation conflict, well within the zone of ‘clear single binocular  
187 vision’ (Hoffman et al., 2008). Indeed, some of the most dramatic reports of vergence micropsia  
188 have been in the presence of large vergence-accommodation conflicts (e.g. 6.5 dioptres in Regan  
189 et al., 1986), so the presence of  $\pm 1$  dioptre should not be objectionable.

190           4. Fourth, we wanted the target to be presented in darkness to exclude any residual visual  
191 cues. An interesting finding from piloting was that the usual technique (having participants view a  
192 CRTs through neutral density filters) wasn’t effective in eradicating residual luminance from the  
193 display (it degraded the target before residual luminance was completely eradicated). Instead, we  
194 achieved this in four ways: First, we used an OLED display (LG OLED55C7V) which unlike  
195 normal displays does not produce residual luminance for black pixels. Second, subjects wore a  
196 mask to block out any residual light, which had red eye filters through which the red stimuli were  
197 viewed (blocking out 100% green and  $\sim 90\%$  blue light). Third, subjects viewed the stimuli through  
198 a narrow ( $17^\circ$ ) viewing window of 48cm x 18cm at a distance of 60cm. Fourth, the whole apparatus  
199 was covered by blackout fabric, and before the experiment began subjects pulled a hood of  
200 blackout fabric over their heads and the external lights were turned off.

201

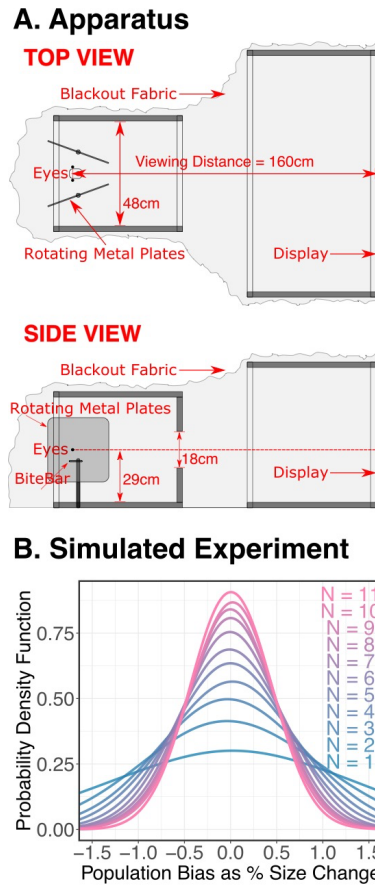

202

203 Figure 3. Methods. A. Experimental Apparatus. B. Simulated Experiment. We simulated the  
204 experiment 10,000 times in Quest+ (bias = 0, detection threshold = 5%, lapse rate = 2%) to model  
205 how increasing the number of participants would improve the accuracy of our hierarchical  
206 Bayesian estimate of the true bias (true bias = 0). We determined that we needed  $n \geq 5$  to rule out  
207 an effect greater than our smallest effect size of interest (vergence size constancy > 1.5%).

208

209 5. Fifth, rather than ask participants to match their visual experience to (1) a visible chart  
210 (Bross, 2000; Lou, 2007; Sperandio et al., 2013) or (2) a memorised chart (Ramsay et al., 2007), or  
211 ask for conscious judgements of (3) the physical size of the after-image (Mon-Williams et al., 1997),  
212 or (4) the after-image's % size change (Carey & Allan, 1996), we (5) built size change estimation  
213 into the stimulus itself (something which cannot be done with an after-image). We increased or  
214 decreased the physical size of the target on each trial by between -20% and +20%, and asked the  
215 participants to make a forced choice ("did the target get bigger or smaller?"). And we tested

216 whether the change in vergence biased their response? If there was no vergence size constancy,  
217 then participants would be at chance in determining whether there was a size change when the  
218 target's physical size didn't change. By contrast, if participants experienced vergence micropsia,  
219 then we would have to increase the physical size of the target in order to cancel out this vergence  
220 micropsia for them to be at chance. And the degree of the bias (i.e. the amount that we have to  
221 increase physical size before participants are at chance) will indicate just how large the vergence  
222 micropsia effect size is.

223 We used a four-parameter maximum likelihood model (Quest+: Watson, 2017; Brainard,  
224 2017) to estimate when participants were at chance. Participants completed 200 trials (10 sets of  
225 20 trials), and on each trial Quest+ tested the size change that would be most informative. In  
226 piloting, we found that the author (an experienced psychophysical observer) could not detect size  
227 changes over 5 seconds that were smaller than 1.5%. So, if vergence changes the perceived size of  
228 the target by less than 1.5%, vergence size constancy can be dismissed as smaller than the smallest  
229 effect size of interest under an inferiority test (Lakens et al., 2018; in our actual experiment this  
230 was revised down to 1.43%, the detection threshold of our most sensitive observer).

231 Assuming vergence doesn't bias size judgements, how would the number of participants  
232 affect our ability to determine this fact? We can simulate the experiment 10,000 times (bias = 0,  
233 detection threshold = 5%, lapse rate = 2%), and fit a hierarchical Bayesian model (discussed below)  
234 to the data (Fig.3B). We found that with 5 or more observers we should be able to rule out any  
235 size constancy effects greater than 1.5%.

236 11 observers (8 female, 3 male; age ranges 20-34, average age 24.5) participated in the  
237 experiment: the author and 10 participants recruited using an online advertisement (13 were  
238 originally recruited, but 1 was excluded because they could not fuse the target, and 2 were excluded  
239 because their vision was blurry with the contact lenses). All participants were screened to ensure  
240 their accommodation was within normal bounds for their age (tested with a RAF near-point rule),  
241 vergence within normal bounds (18D or above on a Clement Clarke prism bar), and stereoacuity

242 within normal bounds (60 arc secs or less on a TNO stereo test). The author's participation was  
243 required to (a) confirm Quest+ mirrored the pilot data, and (b) provide a criterion for the  
244 minimum effect size. All other subjects were naïve as to the purpose of the experiment, and were  
245 paid £15/hr for 3 hours. The study was approved by the School of Health Sciences Research  
246 Ethics Committee at City, University of London in accordance with the Declaration of Helsinki.

247 The code for running the experiment is openly available: <https://osf.io/5nwaz/>, running  
248 on Matlab 2019a (MathWorks) with PsychToolBox 3.0.15 (Kleiner et al., 2007).

249

## 250 **Results**

251

252 Let us consider what we would expect to find according to (a) the null hypothesis (vergence has  
253 no effect on perceived size) and (b) the alternative hypothesis (vergence has an effect on perceived  
254 size). As we have already discussed, if vergence has no effect on perceived size, then it is obvious  
255 that participants should be at chance at determining whether there is a size change just when we  
256 don't introduce a size change (bias = 0). By contrast, if participants experience something close to  
257 full size constancy, then we would have to increase the size of the target by 100% in order to  
258 cancel out the reduction in perceived size caused by vergence micropsia (which in normal viewing  
259 conditions would be a reduction in size of 50% because halving the distance leads to a doubling  
260 of the retinal image size, assuming the small angle approximation).

261 These two hypotheses, and various intermediate degrees of size constancy between these  
262 two extremes, are plotted in Fig.4A. What the hierarchical Bayesian model of our results in Fig.4A  
263 show is that the bias we found was  $\approx 0$ , consistent with there being no vergence size constancy.

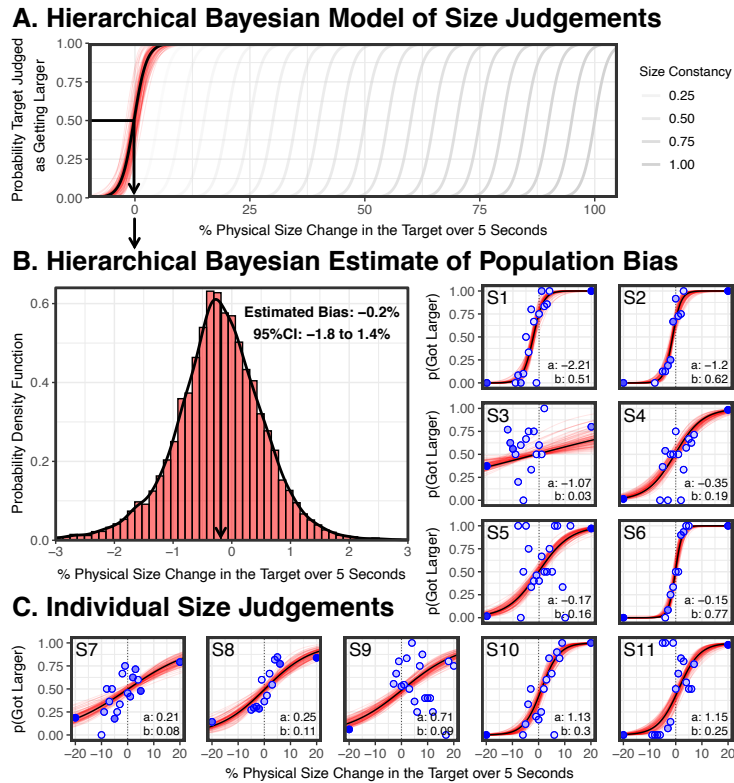

264

265 Figure 4. Results. A. Hierarchical Bayesian model of the population psychometric function in black  
 266 (based on 15,000 posterior estimates, 100 representative posterior estimates in red), plotted against  
 267 predictions for various degrees of vergence size constancy effect sizes (in grey). B. Probability  
 268 density function of 15,000 posterior estimates of the population bias, with a non-significant bias  
 269 of  $-0.2\%$ . C. Individual subject results fitted with Bayesian psychometric functions in black (based  
 270 on 15,000 posterior estimates, 100 representative posterior estimates in red). Blue dots indicating  
 271 the physical size changes tested by Quest+ (with darkness of the dot indicating the number of  
 272 times it was tested). Individual biases cluster around zero (from  $-2.2\%$  to  $1.2\%$ ). For each  
 273 participant, alpha (a) is the bias of the logistic function, and beta (b) is the slope.

274

275 To explain our conclusion, the individual results are plotted in Fig.4C. Each blue dot represents a  
 276 physical size change that was tested by the Quest+ maximum likelihood model, and the darkness  
 277 of the dot indicates the number of times it was tested. We then fit each of the individual sets of  
 278 data with a four-parameter logistic Bayesian psychometric function (indicated with a black line),

279 using the Palamedes Toolbox 1.10.1 (Prins & Kingdom, 2018) with CmdStan 2.22.0, using the  
280 toolbox's standard priors (bias and slope: normal (0,100), upper and lower lapse rates: beta (1,10)),  
281 and based on 15,000 posterior estimates (100 posterior estimates illustrated in red). Fig.4C shows  
282 individual biases range from  $-2.2\%$  to  $+1.2\%$ , but cluster around 0.

283 To estimate the population level psychometric function illustrated in Fig.4A, we used the  
284 Palamedes Toolbox 1.10.1 (Prins & Kingdom, 2018) with CmdStan 2.22.0 to fit a four-parameter  
285 logistic hierarchical Bayesian psychometric function, which fits the data with a multilevel model  
286 that takes into account the variability of each subject. We used the toolbox's standard multilevel  
287 priors which are documented by Prins & Kingdom (2019) and, based on 15,000 posterior estimates  
288 (100 posterior estimates illustrated in red), found a population level bias of  $-0.219\%$  (95% CI:  $-$   
289  $1.82\%$  to  $1.39\%$ ) and a population level slope of  $-0.732$  (95% CI:  $-1.07$  to  $0.378$ ).

290 The estimate that particularly interests us is the population bias, so in Fig.4B we provide a  
291 probability density function of the 15,000 posterior estimates of the bias. We find no statistically  
292 significant bias, and therefore no statistically significant effect of vergence on perceived size.  
293 Indeed, the non-significant bias of  $-0.2\%$  is in the wrong direction for size constancy.

294 To go beyond the negative claim that we found no statistically significant effect (null  
295 hypothesis not rejected) to the positive claim that there is no effect of vergence on perceived size  
296 (null hypothesis accepted), we can make two further arguments.

297 First, from a Bayesian perspective, we can perform a JZS Bayes factor (Rouder et al., 2009).  
298 The estimated Bayes factor that we found was  $3.99$  ( $\pm 0.03\%$ ), which suggests that the data are  
299 four times more likely under the null hypothesis (bias = 0) than under the alternative (bias  $\neq 0$ ).

300 Second, from a frequentist perspective, we can perform an inferiority test that tests  
301 whether, if there is a vergence size constancy effect, it is at least as large as the smallest effect size  
302 of interest (Lakens et al., 2018). You'll remember, we defined our smallest effect size of interest as  
303 the detection threshold for our most sensitive observer (which is  $1.43\%$ ). Put simply, any vergence  
304 size constancy effect that's smaller than a  $1.43\%$  size change won't be detected by any of our

305 observers. Since we have a directional hypothesis (vergence micropsia should reduce, rather than  
306 increase, the apparent size of the target), we specifically tested whether there is a bias  $> 1.43\%$ .  
307 We therefore performed an inferiority test by taking the 90% confidence interval of the population  
308 bias in Fig.4B in the predicted direction, which is 0.96%. Since this is smaller than 1.43% (our  
309 smallest effect size of interest), from a frequentist perspective we can conclude that any vergence  
310 size constancy effect is effectively equivalent to zero (Lakens et al., 2018).

311

## 312 **Discussion**

313

314 According to the literature, “it is well known that vergence is a reliable source of depth information  
315 for size constancy” (Sperandio et al., 2013). But we find no evidence that vergence makes any  
316 contribution to perceived size. To our knowledge, ours is the first study to report a failure of  
317 vergence size constancy at near distances. But ours is also the first study that controls for  
318 confounding perceptual cues (changes in the retinal image) whilst also controlling for confounding  
319 cognitive cues (keeping subjects naïve about changes in absolute distance). Beyond vergence size  
320 constancy, our results have three further important implications:

321 1. Visual Scale: First, these results substantiate a broader concern about visual scale. Visual  
322 scale is thought to be provided by a number of well-established distance cues, such as vergence,  
323 accommodation, motion parallax, familiar size, and the ground-plane. However, first,  
324 accommodation (Mon-Williams & Tresilian, 2000) and motion parallax (Renner et al., 2013) have  
325 been found to be largely ineffective as absolute distance cues, second, the ground-plane only  
326 applies to limited viewing conditions (Creem-Regehr et al., 2015), and third, familiar size is merely  
327 thought to affect our cognition, rather than our perception, of visual scale (Gogel, 1969; Predebon,  
328 1992). Given these shortcomings, vergence was meant to provide a solid anchor for our size and  
329 distance judgements in near space. But our results challenge this conclusion. Instead, our results  
330 demonstrate that visual scale is much more reliant on cognitive influences than previously thought.

331 Our results are consistent with our argument in Linton (2017; 2018) that visual scale is based solely  
332 on higher level cognitive processes, where we extend Gogel (1969)'s and Predebon (1992)'s  
333 observations about familiar size to argue that visual scale itself is a purely cognitive process.

334 2. Neural Mechanisms: Ever since Trotter et al. (1992) found that the large majority of  
335 neurons in the monkey primary visual cortex (V1) were modulated by vergence, it has been  
336 suggested that processing of the vergence signal in V1 plays an important role in size constancy.  
337 Further evidence for the vergence modulation of V1 is found by Trotter et al. (1993); Trotter et  
338 al. (1996); Masson et al. (1997); Dobbins et al. (1998); Trotter & Celebrini (1999); Cumming &  
339 Parker (1999); Trotter et al. (2004); Cottureau et al. (2014); see also Richards (1968) on LGN;  
340 Gnadt & Mays (1991; 1995); Quinlan & Culham (2007); Culham et al. (2008) on the parietal cortex;  
341 and Lehky et al. (1990) and Pouget & Sejnowski (1994) for an early neural network model that  
342 Trotter et al. (1992) complements.

343 More recently Chen et al. (2019) have looked at the time course of size constancy, and  
344 found that vergence and the retinal image are not integrated during (a) initial processing in V1  
345 (~50ms), but instead during (b) recurrent processing within V1, and/or (c) re-entrant projections  
346 from higher-order visual areas (e.g. Gnadt & Mays, 1991; 1995), both of which are consistent with  
347 the ~150ms timeframe. And this is consistent with Trotter et al. (1992)'s suggestion that whilst  
348 vergence responsive neurons encode vergence distance, further computations are required to scale  
349 the retinal image, so vergence responsive neurons “constitute an intermediate step in the  
350 computation of true depth, as suggested by neural network models [Lehky et al., 1990].”

351 However this whole line of research, from Trotter et al. (1992) to the present, is prefaced  
352 on the fact that “psychophysical data suggest an important role for vergence” (Trotter et al., 1992).  
353 But this is exactly what our results in this experiment, and in Linton (2020), question. We therefore  
354 conclude that there is no link between the vergence modulation of neurons in V1 (or indeed  
355 anywhere else) and size perception. According to our alternative account, visual scale is entirely  
356 dependent upon top-down cognitive processing. Indeed, without the vergence signal we appear to



357 lose any early visual processing of absolute distance (one exception might be vertical disparities,  
358 but Trotter et al., 1992 proceed on the basis that they are ineffective, and the subsequent evidence  
359 in favour is equivocal at best: see Cumming et al., 1991; Sobel & Collett, 1991; Rogers & Bradshaw,  
360 1995). So what are we to make of the results in Trotter et al. (1992)? One possibility is that they  
361 reflect the participant's own purely cognitive knowledge about their changing gaze position, even  
362 though this has no effect on their visual experience. This is consistent with increasing evidence  
363 that V1 is implicated in purely cognitive (non-visual) processing, e.g. the location of rewards  
364 amongst visually identical targets (Saleem et al., 2018).

365         3. Multisensory Integration: Subjective knowledge of gaze position also appears to play an  
366 important role in multisensory integration. The Taylor illusion (where an after-image of the hand  
367 appears to shrink or grow with physical hand movements) is an important paradigm for recent  
368 discussions of multisensory integration (Faivre et al., 2017a; Grove et al., 2019). The best current  
369 explanation for the Taylor illusion is that it is due (Taylor, 1941; Morrison & Whiteside, 1984;  
370 Mon-Williams et al., 1997) or almost entirely due (Sperandio et al., 2013) to the change in vergence  
371 as the eyes track the hand moving in darkness. However, in light of our results this explanation no  
372 longer seems sustainable, since vergence had no effect on the perceived size of the target once  
373 subjective knowledge about the fixation distance had been controlled for. Nor does this imply that  
374 the Taylor illusion is primarily due to proprioceptive information from hand motion directly  
375 influencing visual perception (Carey & Allan, 1996; Ramsay et al., 2007), since Sperandio et al.  
376 (2013) demonstrate that when vergence and hand motion are in conflict, the Taylor illusion follows  
377 vergence, and the effect is only marginally reduced in size.

378         Instead, what both accounts are missing is the participant's subjective knowledge about  
379 their own changing hand and gaze positions. This explains why Sperandio et al. (2013) found that  
380 vergence affects perceived size when their participants knew about their changing gaze position  
381 (from their hand or from the motion in depth of an LED), but why we didn't when our participants  
382 were ignorant of this fact. There are two ways in which conscious knowledge about our changing

383 hand or gaze position could influence size constancy. First, our subjective knowledge could  
384 influence our visual experience (so-called ‘cognitive penetration’ of perception by cognition). But  
385 we are skeptical of invoking ‘cognitive penetration’ to explain an effect that could also be explained  
386 as a purely cognitive bias (for further skeptical discussions of ‘cognitive penetration’ see Fodor,  
387 1983; Pylyshyn, 1999; Firestone & Scholl, 2016). Second, under our alternative cognitive bias  
388 account, the integration of the retinal image and our changing gaze position could be purely  
389 cognitive, rather than perceptual. Our visual experience of the after-image’s angular size remains  
390 constant, but our hand movements cognitively bias our interpretation of our constant visual  
391 experience: because we know that our hand is moving towards our face, we interpret the constant  
392 angular size of the after-image as a reduction in physical size.

393         This purely cognitive interpretation of the Taylor illusion has wide reaching implications  
394 for multisensory integration, specifically the integration of vision and hand movements. The  
395 Taylor illusion is taken as evidence of multisensory integration at the level of perception.  
396 Specifically, that vision “relies on multimodal signals” (Sperandio et al., 2013; Chen et al., 2018)  
397 and that “visual consciousness is shaped by the body” (Faivre et al., 2015; Faivre et al., 2017a;  
398 Faivre et al., 2017b). But if the integration of proprioception and the retinal image could be purely  
399 cognitive in the context of vergence (the major driver of the Taylor illusion, Sperandio et al., 2013),  
400 there’s no reason why the integration of proprioception and the retinal image in the context of  
401 integrating vision and hand movements (the minor driver of the Taylor illusion, Sperandio et al.,  
402 2013) couldn’t equally be accounted for in purely cognitive terms. This cognitive approach also  
403 suggests a non-perceptual explanation for variants of the Taylor illusion that appear to  
404 demonstrate the integration of vision with the rubber-hand illusion (Faivre et al., 2017a) and tool  
405 use (Grove et al., 2019). And cognitive interpretations of the integration of vision and  
406 proprioception are also advanced in the contexts of vision and touch in slant estimation (Hillis et  
407 al., 2002; Gepshstein et al., 2005) by Linton (2017), pp.37-38 and pp.65-66, and vision and vestibular  
408 cues in self-motion (Fischer & Kornmüller, 1930; Ash et al., 2011) by Linton (2018).

## 409 **Conclusions**

410

411 Vergence is thought to provide an essential signal for size constancy. We tested vergence size  
412 constancy for the first time without confounding cues, and found no evidence that eye movements  
413 make any contribution to perceived size. This suggests that (1) our impression of visual scale is  
414 much more reliant on cognitive processing than previously thought, with the further implications  
415 that (2) vergence modulation of neurons in V1 cannot be responsible for our impression of visual  
416 scale, and (3) the integration of the retinal image with proprioceptive cues from the hand appears  
417 to be reliant upon observers having subjective knowledge about their hand and gaze position.

418

419

## 420 **Acknowledgements**

421

422 This research was conducted under the supervision of Christopher Tyler and Simon Grant. We  
423 thank Salma Ahmad, Mark Mayhew, and Deanna Taylor, for fitting the contact lenses, and Jugjeet  
424 Bansal, Priya Mehta, and the staff of the CitySight clinic for their assistance. We thank Joshua  
425 Solomon, Matteo Lisi, Byki Huntjens, Michael Morgan, Chris Hull, and Pete Jones for their advice.  
426 We also thank audiences at the Applied Vision Association (2019), the British Machine Vision  
427 Association's '3D worlds from 2D images in humans and machines' meeting (2020):  
428 <https://youtu.be/6P3EYCEn52A> and the (Virtual) Vision Sciences Society (2020):  
429 <https://osf.io/tb3un/> / <http://youtu.be/VhpYjPj5Q80> where this work was presented.

430

## 431 **Open Practice Statement**

432

433 Code for running the experiment, and all the data and analysis scripts, are accessible in an open  
434 access repository: <https://osf.io/5nwaz/>

435

436 **References**

- 437 Adams, O. S. (1955). Stereogram decentration and stereo-base as factors influencing the  
438 apparent size of stereoscopic pictures. *The American Journal of Psychology*, *68*(1), 54–68.
- 439 Ash, A., Palmisano, S., & Kim, J. (2011). Vection in Depth during Consistent and Inconsistent  
440 Multisensory Stimulation. *Perception*, *40*(2), 155–174. <https://doi.org/10.1068/p6837>
- 441 Biersdorf, W. R., Ohwaki, S., & Kozil, D. J. (1963). The Effect of Instructions and Oculomotor  
442 Adjustments on Apparent Size. *The American Journal of Psychology*, *76*(1), 1–17. JSTOR.  
443 <https://doi.org/10.2307/1419994>
- 444 Bishop, P. O. (1989). Vertical Disparity, Egocentric Distance and Stereoscopic Depth  
445 Constancy: A New Interpretation. *Proceedings of the Royal Society of London. Series B, Biological*  
446 *Sciences*, *237*(1289), 445–469.
- 447 Brainard, D. H. (2017). *mQUESTPlus: A Matlab implementation of QUEST+*.  
448 <https://github.com/brainardlab/mQUESTPlus>
- 449 Brenner, E., & van Damme, W. J. (1998). Judging distance from ocular convergence. *Vision*  
450 *Research*, *38*(4), 493–498.
- 451 Brewster, D. (1844). On the knowledge of distance given by binocular vision. *Transactions of the*  
452 *Royal Society of Edinburgh*, *15*, 663–674.
- 453 Bross, M. (2000). Emmert’s law in the dark: Active and passive proprioceptive effects on  
454 positive visual afterimages. *Perception*, *29*(11), 1385–1391. <https://doi.org/10.1068/p3038>
- 455 Carey, D. P., & Allan, K. (1996). A motor signal and “visual” size perception. *Experimental Brain*  
456 *Research*, *110*(3), 482–486. <https://doi.org/10.1007/BF00229148>
- 457 Chen, J., Sperandio, I., & Goodale, M. A. (2018). Proprioceptive Distance Cues Restore Perfect  
458 Size Constancy in Grasping, but Not Perception, When Vision Is Limited. *Current Biology:*  
459 *CB*, *28*(6), 927-932.e4. <https://doi.org/10.1016/j.cub.2018.01.076>

- 460 Chen, J., Sperandio, I., Henry, M. J., & Goodale, M. A. (2019). Changing the Real Viewing  
461 Distance Reveals the Temporal Evolution of Size Constancy in Visual Cortex. *Current*  
462 *Biology*, 29(13), 2237-2243.e4. <https://doi.org/10.1016/j.cub.2019.05.069>
- 463 Combe, E., & Wexler, M. (2010). Observer Movement and Size Constancy. *Psychological Science*,  
464 21(5), 667–675. JSTOR.
- 465 Cottureau, B., Durand, J.-B., Vayssière, N., & Trotter, Y. (2014). The influence of eye vergence  
466 on retinotopic organization in human early visual cortex. *F1000Research*, 5.  
467 <https://doi.org/10.7490/f1000research.1096674.1>
- 468 Creem-Regehr, S. H., Stefanucci, J. K., & Thompson, W. B. (2015). Chapter Six - Perceiving  
469 Absolute Scale in Virtual Environments: How Theory and Application Have Mutually  
470 Informed the Role of Body-Based Perception. In B. H. Ross (Ed.), *Psychology of Learning*  
471 *and Motivation* (Vol. 62, pp. 195–224). Academic Press.  
472 <https://doi.org/10.1016/bs.plm.2014.09.006>
- 473 Culham, J., Gallivan, J., Cavina-Pratesi, C., & Quinlan, D. (2008). FMRI investigations of  
474 reaching and ego space in human superior parieto-occipital cortex. In *Embodiment, Ego-*  
475 *space and Action* (pp. 247–274).
- 476 Cumming, B. G., Johnston, E. B., & Parker, A. J. (1991). Vertical Disparities and Perception of  
477 Three-Dimensional Shape. *Nature; London*, 349(6308), 411–413.
- 478 Cumming, B. G., & Parker, A. J. (1999). Binocular Neurons in V1 of Awake Monkeys Are  
479 Selective for Absolute, Not Relative, Disparity. *Journal of Neuroscience*, 19(13), 5602–5618.  
480 <https://doi.org/10.1523/JNEUROSCI.19-13-05602.1999>
- 481 Descartes, R. (1637). *Dioptrique (Optics)*. In J. Cottingham, R. Stoothoff, & D. Murdoch (Eds.), *The*  
482 *Philosophical Writings of Descartes: Volume 1 (1985)*. Cambridge University Press.
- 483 Dobbins, A. C., Jeo, R. M., Fiser, J., & Allman, J. M. (1998). Distance Modulation of Neural  
484 Activity in the Visual Cortex. *Science*, 281(5376), 552–555.  
485 <https://doi.org/10.1126/science.281.5376.552>

- 486 Emmert, E. (1881). Größenverhältnisse der Nachbilder. *Klinische Monatsblätter Für Augenheilkunde*  
487 *Und Für Augenärztliche Fortbildung*, 19, 443–450.
- 488 Enright, J. T. (1989). Enright JT (1989). “The eye, the brain and the size of the moon: Toward a  
489 unified oculomotor hypothesis for the moon illusion”. In Hershenson, Maurice (ed.).  
490 The Moon illusion. Hillsdale, N.J: L. Erlbaum Associates. Pp. 59–121. In M.  
491 Hershenson, *The Moon Illusion* (pp. 59–121). L. Erlbaum Associates.
- 492 Faivre, N., Arzi, A., Lunghi, C., & Salomon, R. (2017b). Consciousness is more than meets the  
493 eye: A call for a multisensory study of subjective experience. *Neuroscience of Consciousness*,  
494 2017(1). <https://doi.org/10.1093/nc/nix003>
- 495 Faivre, N., Döenz, J., Scandola, M., Dhanis, H., Ruiz, J. B., Bernasconi, F., Salomon, R., &  
496 Blanke, O. (2017a). Self-Grounded Vision: Hand Ownership Modulates Visual Location  
497 through Cortical  $\beta$  and  $\gamma$  Oscillations. *Journal of Neuroscience*, 37(1), 11–22.  
498 <https://doi.org/10.1523/JNEUROSCI.0563-16.2016>
- 499 Faivre, N., Salomon, R., & Blanke, O. (2015). Visual consciousness and bodily self-  
500 consciousness. *Current Opinion in Neurology*, 28(1), 23–28.  
501 <https://doi.org/10.1097/WCO.0000000000000160>
- 502 Firestone, C., & Scholl, B. J. (2016). Cognition does not affect perception: Evaluating the  
503 evidence for “top-down” effects. *The Behavioral and Brain Sciences*, 39, e229.  
504 <https://doi.org/10.1017/S0140525X15000965>
- 505 Fischer, M. H., & Kornmüller, A. E. (1930). Optokinetic-Induced Motion Perception and  
506 Optokinetic Nystagmus. *Journal of Psychology and Neurology (Leipzig)*, 41, 273–308.
- 507 Fodor, J. A. (1983). *The Modularity of Mind: An Essay on Faculty Psychology*. MIT Press.
- 508 Frank, H. (1930). Ueber den Einfluss inadaquater Konvergenz und Akkommodation auf die  
509 Sehgrösse. *Psychol. Forsch.*, 13, 135–144.

- 510 Gepshtein, S., Burge, J., Ernst, M. O., & Banks, M. S. (2005). The combination of vision and  
511 touch depends on spatial proximity. *Journal of Vision*, 5(11), 7–7.  
512 <https://doi.org/10.1167/5.11.7>
- 513 Gnadt, J. W., & Mays, L. E. (1991). Depth tuning in area LIP by disparity and accommodative  
514 cues. *Soc Neurosci Abs*, 17, 1113.
- 515 Gnadt, J. W., & Mays, L. E. (1995). Neurons in monkey parietal area LIP are tuned for eye-  
516 movement parameters in three-dimensional space. *Journal of Neurophysiology*, 73(1), 280–  
517 297. <https://doi.org/10.1152/jn.1995.73.1.280>
- 518 Goethe, J. W. von. (1810). *Zur Farbenlehre*. in der J.G. Cotta'schen Buchhandlung.
- 519 Gogel, W. C. (1962). The Effect of Convergence on Perceived Size and Distance. *The Journal of*  
520 *Psychology*, 53(2), 475–489. <https://doi.org/10.1080/00223980.1962.9916591>
- 521 Gogel, W. C. (1969). The Sensing of Retinal Size. *Vision Research*, 9, 1079–1094.
- 522 Goodale, M. A. (2020). *How big is that banana? Differences in size constancy for perception and action*.  
523 [https://drive.google.com/file/d/1LiOvNebMXRwAB6M53\\_XIc34vzP4qPWW9/view](https://drive.google.com/file/d/1LiOvNebMXRwAB6M53_XIc34vzP4qPWW9/view)
- 524 Gregory, R. L., Wallace, J. G., & Campbell, F. W. (1959). Changes in the size and shape of visual  
525 after-images observed in complete darkness during changes of position in space. *Quarterly*  
526 *Journal of Experimental Psychology*, 11(1), 54–55.  
527 <https://doi.org/10.1080/17470215908416288>
- 528 Grove, C., Cardinali, L., & Sperandio, I. (2019). Does Tool-Use Modulate the Perceived Size of  
529 an Afterimage During the Taylor Illusion? [Abstract ECVF Leuven 2019]. *Perception*, 48,  
530 181.
- 531 Heinemann, E. G., Tulving, E., & Nachmias, J. (1959). The effect of oculomotor adjustments on  
532 apparent size. *The American Journal of Psychology*, 72, 32–45.  
533 <https://doi.org/10.2307/1420209>
- 534 Helmholtz, H. (1857). Das Telestereoskop. *Annalen Der Physik*, 178(9), 167–175.  
535 <https://doi.org/10.1002/andp.18571780907>

- 536 Helmholtz, H. (1866). *Handbuch der Physiologischen Optik, Vol.III (translated by J. P. C. Southall 1925*  
537 *Opt. Soc. Am. Section 26, reprinted New York: Dover, 1962).*
- 538 Helmholtz, P. H. (1858). II. On the telestereoscope. *The London, Edinburgh, and Dublin*  
539 *Philosophical Magazine and Journal of Science, 15(97), 19–24.*  
540 <https://doi.org/10.1080/14786445808642433>
- 541 Hermans, T. G. (1937). Visual size constancy as a function of convergence. *Journal of Experimental*  
542 *Psychology, 21(2), 145–161.* <https://doi.org/10.1037/h0058367>
- 543 Hermans, Thomas G. (1954). The relationship of convergence and elevation changes to  
544 judgments of size. *Journal of Experimental Psychology, 48(3), 204–208.*  
545 <https://doi.org/10.1037/h0059355>
- 546 Hillis, J. M., Ernst, M. O., Banks, M. S., & Landy, M. S. (2002). Combining Sensory Information:  
547 Mandatory Fusion Within, but Not Between, Senses. *Science, 298(5598), 1627–1630.*  
548 <https://doi.org/10.1126/science.1075396>
- 549 Hoffman, D. M., Girshick, A. R., Akeley, K., & Banks, M. S. (2008). Vergence–accommodation  
550 conflicts hinder visual performance and cause visual fatigue. *Journal of Vision, 8(3), 33–33.*  
551 <https://doi.org/10.1167/8.3.33>
- 552 Howard, I. P. (2012). *Perceiving in Depth, Volume 3: Other Mechanisms of Depth Perception.* Oxford  
553 University Press.
- 554 Judd, C. H. (1897). Some facts of binocular vision. *Psychological Review, 4(4), 374–389.*  
555 <https://doi.org/10.1037/h0073701>
- 556 Kepler, J. (1604). Paralipomena to Witelo. In W. H. Donahue (Trans.), *Optics: Paralipomena to*  
557 *Witelo and Optical Part of Astronomy.* Green Lion Press, 2000.
- 558 Kleiner, M., Brainard, D., & Pelli, D. (2007). Kleiner M, Brainard D, Pelli D, 2007, “What’s new  
559 in Psychtoolbox-3?” Perception 36 ECVF Abstract Supplement. *Perception, 36(ECVP*  
560 *Abstract Supplement).*



- 561 Kohly, R. P., & Ono, H. (2002). Fixating on the wallpaper illusion: A commentary on “The role  
562 of vergence in the perception of distance: A fair test of Bishop Berkeley’s claim” by  
563 Logvinenko et al. (2001). *Spatial Vision*, 15(3), 377–386.
- 564 Komoda, M. K., & Ono, H. (1974). Oculomotor adjustments and size-distance perception.  
565 *Perception & Psychophysics*, 15(2), 353–360. <https://doi.org/10.3758/BF03213958>
- 566 Konrad, R., Angelopoulos, A., & Wetzstein, G. (2019). Gaze-Contingent Ocular Parallax  
567 Rendering for Virtual Reality. *ArXiv:1906.09740 [Cs]*. <http://arxiv.org/abs/1906.09740>
- 568 Lakens, D., Scheel, A. M., & Isager, P. M. (2018). Equivalence Testing for Psychological  
569 Research: A Tutorial. *Advances in Methods and Practices in Psychological Science*, 1(2), 259–269.  
570 <https://doi.org/10.1177/2515245918770963>
- 571 Lehky, S., Pouget, A., & Sejnowski, T. (1990). Neural Models of Binocular Depth Perception.  
572 *Cold Spring Harbor Symposia on Quantitative Biology*, 55, 765–777.  
573 <https://doi.org/10.1101/SQB.1990.055.01.072>
- 574 Leibowitz, H., Brislin, R., Perlmutter, L., & Hennessy, R. (1969). Ponzo Perspective Illusion as a  
575 Manifestation of Space Perception. *Science*, 166(3909), 1174–1176.  
576 <https://doi.org/10.1126/science.166.3909.1174>
- 577 Leibowitz, H., & Moore, D. (1966). Role of changes in accommodation and convergence in the  
578 perception of size. *Journal of the Optical Society of America*, 56(8), 1120–1129.  
579 <https://doi.org/10.1364/JOSA.56.001120>
- 580 Leibowitz, H. W., Shiina, K., & Hennessy, R. T. (1972). Oculomotor adjustments and size  
581 constancy. *Perception & Psychophysics*, 12(6), 497–500.  
582 <https://doi.org/10.3758/BF03210943>
- 583 Lie, I. (1965). Convergence as a cue to perceived size and distance. *Scandinavian Journal of*  
584 *Psychology*, 6(4), 109–116. <https://doi.org/10.1111/j.1467-9450.1965.tb01059.x>
- 585 Linton, P. (2017). *The Perception and Cognition of Visual Space*. Palgrave.
- 586 Linton, P. (2018). *Do We See Scale?* <https://www.biorxiv.org/content/10.1101/371948v1>

- 587 Linton, Paul. (2019). *Would Gaze-Contingent Rendering Improve Depth Perception in Virtual and*  
588 *Augmented Reality?* <https://arxiv.org/abs/1905.10366v1>
- 589 Linton, Paul. (2020). Does vision extract absolute distance from vergence? *Attention, Perception, &*  
590 *Psychophysics*, 82(6), 3176–3195. <https://doi.org/10.3758/s13414-020-02006-1>
- 591 Locke, J. (1849). XXV. On single and double vision produced by viewing objects with both eyes;  
592 and on an optical illusion with regard to the distance of objects. *The London, Edinburgh,*  
593 *and Dublin Philosophical Magazine and Journal of Science*, 34(228), 195–201.  
594 <https://doi.org/10.1080/14786444908646207>
- 595 Locke, N. M. (1938). Some Factors in Size-Constancy. *The American Journal of Psychology*, 51(3),  
596 514–520. JSTOR. <https://doi.org/10.2307/1416151>
- 597 Lou, L. (2007). Apparent Afterimage Size, Emmert’s Law, and Oculomotor Adjustment.  
598 *Perception*, 36(8), 1214–1228. <https://doi.org/10.1068/p5513>
- 599 Marin, F., Rohatgi, A., & Charlot, S. (2017). WebPlotDigitizer, a polyvalent and free software to  
600 extract spectra from old astronomical publications: Application to ultraviolet  
601 spectropolarimetry. *ArXiv:1708.02025 [Astro-Ph]*. <http://arxiv.org/abs/1708.02025>
- 602 Masson, G. S., Busetini, C., & Miles, F. A. (1997). Vergence eye movements in response to  
603 binocular disparity without depth perception. *Nature*, 389(6648), 283–286.  
604 <https://doi.org/10.1038/38496>
- 605 McCready, D. W. (1965). Size-distance perception and accommodation-convergence  
606 micropsia—A critique. *Vision Research*, 5(4), 189–206. [https://doi.org/10.1016/0042-](https://doi.org/10.1016/0042-6989(65)90065-9)  
607 [6989\(65\)90065-9](https://doi.org/10.1016/0042-6989(65)90065-9)
- 608 Meyer, H. (1842). Ueber einige Täuschungen in der Entfernung u. Grösse der Gesichtsobjecte.  
609 *Archiv Für Physiologische Heilkunde*.
- 610 Meyer, Hermann. (1852). Ueber die Schätzung der Grösse und der Entfernung der  
611 Gesichtsobjecte aus der Convergenz der Augenaxen. *Annalen Der Physik*, 161(2), 198–  
612 207. <https://doi.org/10.1002/andp.18521610204>

- 613 Millard, A. S., Sperandio, I., & Chouinard, P. A. (2020). The contribution of stereopsis in  
614 Emmert's law. *Experimental Brain Research*, *238*(4), 1061–1072.  
615 <https://doi.org/10.1007/s00221-020-05747-5>
- 616 Mon-Williams, M., & Tresilian, J. R. (1999). Some Recent Studies on the Extraretinal  
617 Contribution to Distance Perception. *Perception*, *28*(2), 167–181.  
618 <https://doi.org/10.1068/p2737>
- 619 Mon-Williams, M., & Tresilian, J. R. (2000). Ordinal depth information from accommodation?  
620 *Ergonomics*, *43*(3), 391–404. <https://doi.org/10.1080/001401300184486>
- 621 Mon-Williams, M., Tresilian, J. R., Plooy, A., Wann, J. P., & Broerse, J. (1997). Looking at the  
622 task in hand: Vergence eye movements and perceived size. *Experimental Brain Research*,  
623 *117*(3), 501–506. <https://doi.org/10.1007/s002210050246>
- 624 Morrison, J. D., & Whiteside, T. C. (1984). Binocular cues in the perception of distance of a  
625 point source of light. *Perception*, *13*(5), 555–566. <https://doi.org/10.1068/p130555>
- 626 Murray, S. O., Boyaci, H., & Kersten, D. (2006). The representation of perceived angular size in  
627 human primary visual cortex. *Nature Neuroscience*, *9*(3), 429–434.  
628 <https://doi.org/10.1038/nn1641>
- 629 Newman, D. G., & Ostler, D. (2009, July). *Hyperstereopsis Associated with Helmet-Mounted Sighting*  
630 *and Display Systems for Helicopter Pilots* [Text]. Aerospace Medical Association.  
631 <https://doi.org/info:doi/10.3357/ASEM.21005.2009>
- 632 Ono, H., & Comerford, J. (1977). Stereoscopic depth constancy. In W. Epstein (Ed.), *Stability*  
633 *and constancy in visual perception: Mechanisms and process*. Wiley.
- 634 Ono, H., Mitson, L., & Seabrook, K. (1971). Change in convergence and retinal disparities as an  
635 explanation for the wallpaper phenomenon. *Journal of Experimental Psychology*, *91*, 1–10.  
636 <https://doi.org/10.1037/h0031795>

- 637 Pouget, A., & Sejnowski, T. J. (1994). A neural model of the cortical representation of egocentric  
638 distance. *Cerebral Cortex (New York, N.Y.: 1991)*, 4(3), 314–329.  
639 <https://doi.org/10.1093/cercor/4.3.314>
- 640 Predebon, J. (1992). The role of instructions and familiar size in absolute judgments of size and  
641 distance. *Perception & Psychophysics*, 51(4), 344–354. <https://doi.org/10.3758/BF03211628>
- 642 Priestley, J. (1772). *The History and Present State of Discoveries Relating to Vision, Light, and Colours*. J.  
643 Johnson.
- 644 Prins, N., & Kingdom, F. A. A. (2018). Applying the Model-Comparison Approach to Test  
645 Specific Research Hypotheses in Psychophysical Research Using the Palamedes Toolbox.  
646 *Frontiers in Psychology*, 9. <https://doi.org/10.3389/fpsyg.2018.01250>
- 647 Prins, N., & Kingdom, F. A. A. (2019).  
648 <http://www.palamedestoolbox.org/hierarchicalbayesian.html>
- 649 Priot, A. E., Neveu, P., Philippe, M., & Roumes, C. (2012). Adaptation to alterations of apparent  
650 distance in stereoscopic displays: From lab to hyperstereopsis. *2012 International Conference*  
651 *on 3D Imaging (IC3D)*, 1–7. <https://doi.org/10.1109/IC3D.2012.6615123>
- 652 Priot, A.-E., Laboissière, R., Plantier, J., Prablanc, C., & Roumes, C. (2011). Partitioning the  
653 components of visuomotor adaptation to prism-altered distance. *Neuropsychologia*, 49(3),  
654 498–506. <https://doi.org/10.1016/j.neuropsychologia.2010.11.028>
- 655 Priot, A.-E., Laboissière, R., Sillan, O., Roumes, C., & Prablanc, C. (2010). Adaptation of  
656 egocentric distance perception under telestereoscopic viewing within reaching space.  
657 *Experimental Brain Research*, 202(4), 825–836. <https://doi.org/10.1007/s00221-010-2188-4>
- 658 Priot, A.-E., Vacher, A., Vienne, C., Neveu, P., & Roumes, C. (2018). The initial effects of  
659 hyperstereopsis on visual perception in helicopter pilots flying with see-through helmet-  
660 mounted displays. *Displays*, 51, 1–8. <https://doi.org/10.1016/j.displa.2017.11.002>

- 661 Pylyshyn, Z. (1999). Is vision continuous with cognition?: The case for cognitive impenetrability  
662 of visual perception. *Behavioral and Brain Sciences*, 22(3), 341–365.  
663 <https://doi.org/10.1017/S0140525X99002022>
- 664 Quinlan, D. J., & Culham, J. C. (2007). fMRI reveals a preference for near viewing in the human  
665 parieto-occipital cortex. *NeuroImage*, 36(1), 167–187.  
666 <https://doi.org/10.1016/j.neuroimage.2007.02.029>
- 667 Ramsay, A. I. G., Carey, D. P., & Jackson, S. R. (2007). Visual-proprioceptive mismatch and the  
668 Taylor illusion. *Experimental Brain Research*, 176(1), 173–181.  
669 <https://doi.org/10.1007/s00221-006-0609-1>
- 670 Regan, D., Erkelens, C. J., & Collewijn, H. (1986). Necessary conditions for the perception of  
671 motion in depth. *Investigative Ophthalmology & Visual Science*, 27(4), 584–597.
- 672 Renner, R. S., Velichkovsky, B. M., & Helmert, J. R. (2013). The Perception of Egocentric  
673 Distances in Virtual Environments—A Review. *ACM Comput. Surv.*, 46(2), 23:1–23:40.  
674 <https://doi.org/10.1145/2543581.2543590>
- 675 Richards, W. (1968). Spatial remapping in the primate visual system. *Kybernetik*, 4(4), 146–156.  
676 <https://doi.org/10.1007/BF00288548>
- 677 Rogers, B. (2009). Are stereoscopic cues ignored in telestereoscopic viewing? *Journal of Vision*,  
678 9(8), 288–288. <https://doi.org/10.1167/9.8.288>
- 679 Rogers, B. J. (2011). Information, illusion, and constancy in telestereoscopic viewing. In L. R.  
680 Harris & M. R. M. Jenkin, *Vision in 3D Environments*. Cambridge University Press.
- 681 Rogers, B. J., & Bradshaw, M. F. (1995). Disparity Scaling and the Perception of Frontoparallel  
682 Surfaces. *Perception*, 24(2), 155–179. <https://doi.org/10.1068/p240155>
- 683 Rouder, J. N., Speckman, P. L., Sun, D., Morey, R. D., & Iverson, G. (2009). Bayesian t tests for  
684 accepting and rejecting the null hypothesis. *Psychonomic Bulletin & Review*, 16(2), 225–237.  
685 <https://doi.org/10.3758/PBR.16.2.225>

- 686 Saleem, A. B., Diamanti, E. M., Fournier, J., Harris, K. D., & Carandini, M. (2018). Coherent  
687 encoding of subjective spatial position in visual cortex and hippocampus. *Nature*,  
688 *562*(7725), 124–127. <https://doi.org/10.1038/s41586-018-0516-1>
- 689 Smith, R. (1738). *A Compleat System of Opticks in Four Books, Viz. A Popular, a Mathematical, a*  
690 *Mechanical, and a Philosophical Treatise. To which are Added Remarks Upon the Whole.* By Robert  
691 *Smith.* author, and sold there.
- 692 Sobel Erik C., & Collett Thomas Stephen. (1991). Does vertical disparity scale the perception of  
693 stereoscopic depth? *Proceedings of the Royal Society of London. Series B: Biological Sciences*,  
694 *244*(1310), 87–90. <https://doi.org/10.1098/rspb.1991.0055>
- 695 Sperandio, I., & Chouinard, P. A. (2015). The Mechanisms of Size Constancy. *Multisensory*  
696 *Research*, *28*(3–4), 253–283. <https://doi.org/10.1163/22134808-00002483>
- 697 Sperandio, I., Chouinard, P. A., & Goodale, M. A. (2012). Retinotopic activity in V1 reflects the  
698 perceived and not the retinal size of an afterimage. *Nature Neuroscience*, *15*(4), 540–542.  
699 <https://doi.org/10.1038/nn.3069>
- 700 Sperandio, I., Kaderali, S., Chouinard, P. A., Frey, J., & Goodale, M. A. (2013). Perceived size  
701 change induced by nonvisual signals in darkness: The relative contribution of vergence  
702 and proprioception. *The Journal of Neuroscience: The Official Journal of the Society for*  
703 *Neuroscience*, *33*(43), 16915–16923. <https://doi.org/10.1523/JNEUROSCI.0977-13.2013>
- 704 Stuart, G., Jennings, S., Kalich, M., Rash, C., Harding, T., & Craig, G. (2009). Flight performance  
705 using a hyperstereo helmet-mounted display: Adaptation to hyperstereopsis. *Proceedings of*  
706 *SPIE - The International Society for Optical Engineering*, *7326*.  
707 <https://doi.org/10.1117/12.820500>
- 708 Suzuki, K. (1986). Effects of oculomotor cues on the apparent size of afterimages. *Japanese*  
709 *Psychological Research*, *28*(4), 168–175. <https://doi.org/10.4992/psycholres1954.28.168>
- 710 Taylor, F. V. (1941). Change in size of the afterimage induced in total darkness. *Journal of*  
711 *Experimental Psychology*, *29*(1), 75–80. <https://doi.org/10.1037/h0058125>

- 712 Trotter, Y., Celebrini, S., Stricanne, B., Thorpe, S., & Imbert, M. (1992). Modulation of neural  
713 stereoscopic processing in primate area V1 by the viewing distance. *Science*, *257*(5074),  
714 1279–1281. <https://doi.org/10.1126/science.1519066>
- 715 Trotter, Y., Celebrini, S., Stricanne, B., Thorpe, S., & Imbert, M. (1996). Neural processing of  
716 stereopsis as a function of viewing distance in primate visual cortical area V1. *Journal of*  
717 *Neurophysiology*, *76*(5), 2872–2885. <https://doi.org/10.1152/jn.1996.76.5.2872>
- 718 Trotter, Yves, & Celebrini, S. (1999). Trotter, Y. & Celebrini, S. Gaze direction controls response  
719 gain in primary visual-cortex neurons. *Nature* *398*, 239–242. *Nature*, *398*, 239–242.  
720 <https://doi.org/10.1038/18444>
- 721 Trotter, Yves, Celebrini, S., & Durand, J. B. (2004). Evidence for implication of primate area V1  
722 in neural 3-D spatial localization processing. *Journal of Physiology-Paris*, *98*(1), 125–134.  
723 <https://doi.org/10.1016/j.jphysparis.2004.03.004>
- 724 Trotter, Yves, Stricanne, B., Celebrini, S., Thorpe, S., & Imbert, M. (1993). *Neural processing of*  
725 *stereopsis as a function of viewing distance*. Oxford University Press. [https://0-www-](https://0-www-oxfordscholarship-com.wam.city.ac.uk/view/10.1093/acprof:oso/9780198547853.001.0001/acprof-9780198547853-chapter-027)  
726 [oxfordscholarship-](https://0-www-oxfordscholarship-com.wam.city.ac.uk/view/10.1093/acprof:oso/9780198547853.001.0001/acprof-9780198547853-chapter-027)  
727 [com.wam.city.ac.uk/view/10.1093/acprof:oso/9780198547853.001.0001/acprof-](https://0-www-oxfordscholarship-com.wam.city.ac.uk/view/10.1093/acprof:oso/9780198547853.001.0001/acprof-9780198547853-chapter-027)  
728 [9780198547853-chapter-027](https://0-www-oxfordscholarship-com.wam.city.ac.uk/view/10.1093/acprof:oso/9780198547853.001.0001/acprof-9780198547853-chapter-027)
- 729 Urist, M. J. (1959). Afterimages and ocular muscle proprioception. *A.M.A. Archives of*  
730 *Ophthalmology*, *61*(2), 230–232. <https://doi.org/10.1001/archophth.1959.00940090232006>
- 731 Viguiet, A., Clément, G., & Trotter, Y. (2001). Distance perception within near visual space.  
732 *Perception*, *30*(1), 115–124. <https://doi.org/10.1068/p3119>
- 733 Von Holst, E. (1955b). Ist der Einfluss der Akkommodation auf die gesehene Dinggröße ein  
734 “reflektorischer” Vorgang? *Naturwissenschaften*, *42*, 445–446.
- 735 Von Holst, E. (1955a). Die Beteiligung von Konvergenz und Akkommodation an der  
736 wahrgenommenen Grössenkonstanz. *Naturwissenschaften*, *42*, 444–445.

- 737 Von Holst, E. (1957). Aktive Leistungen der menschlichen Gesichtswahrnehmung. *Studium*  
738 *Generale*, 10, 231–243.
- 739 Wallach, H., & Zuckerman, C. (1963). The constancy of stereoscopic depth. *The American Journal*  
740 *of Psychology*, 76, 404–412.
- 741 Watson, A. B. (2017). QUEST+: A general multidimensional Bayesian adaptive psychometric  
742 method. *Journal of Vision*, 17(3), 10–10. <https://doi.org/10.1167/17.3.10>
- 743 Wheatstone, C. (1838). XVIII. Contributions to the physiology of vision. —Part the first. On  
744 some remarkable, and hitherto unobserved, phenomena of binocular vision. *Philosophical*  
745 *Transactions of the Royal Society of London*, 128, 371–394.  
746 <https://doi.org/10.1098/rstl.1838.0019>
- 747 Wheatstone, C. (1852). I. The Bakerian Lecture.—Contributions to the physiology of vision.—  
748 Part the second. On some remarkable, and hitherto unobserved, phenomena of  
749 binocular vision (continued). *Philosophical Transactions of the Royal Society of London*, 142, 1–  
750 17. <https://doi.org/10.1098/rstl.1852.0001>
- 751 Zenkin, G. M., & Petrov, A. P. (2015). Transformation of the Visual Afterimage Under Subject's  
752 Eye and Body Movements and the Visual Field Constancy Mechanisms. *Perception*, 44(8–  
753 9), 973–985. <https://doi.org/10.1177/0301006615594937>  
754
